# Supplementary material for: A field survey using LAMP assay for detection of Schistosoma mansoni in a low-transmission area of schistosomiasis in Umbuzeiro, Brazil: Assessment in human and snail samples
Source: PubMed Central journal article supplement (PMC5849311; doi:10.1371/journal.pntd.0006314), 2018-03-13

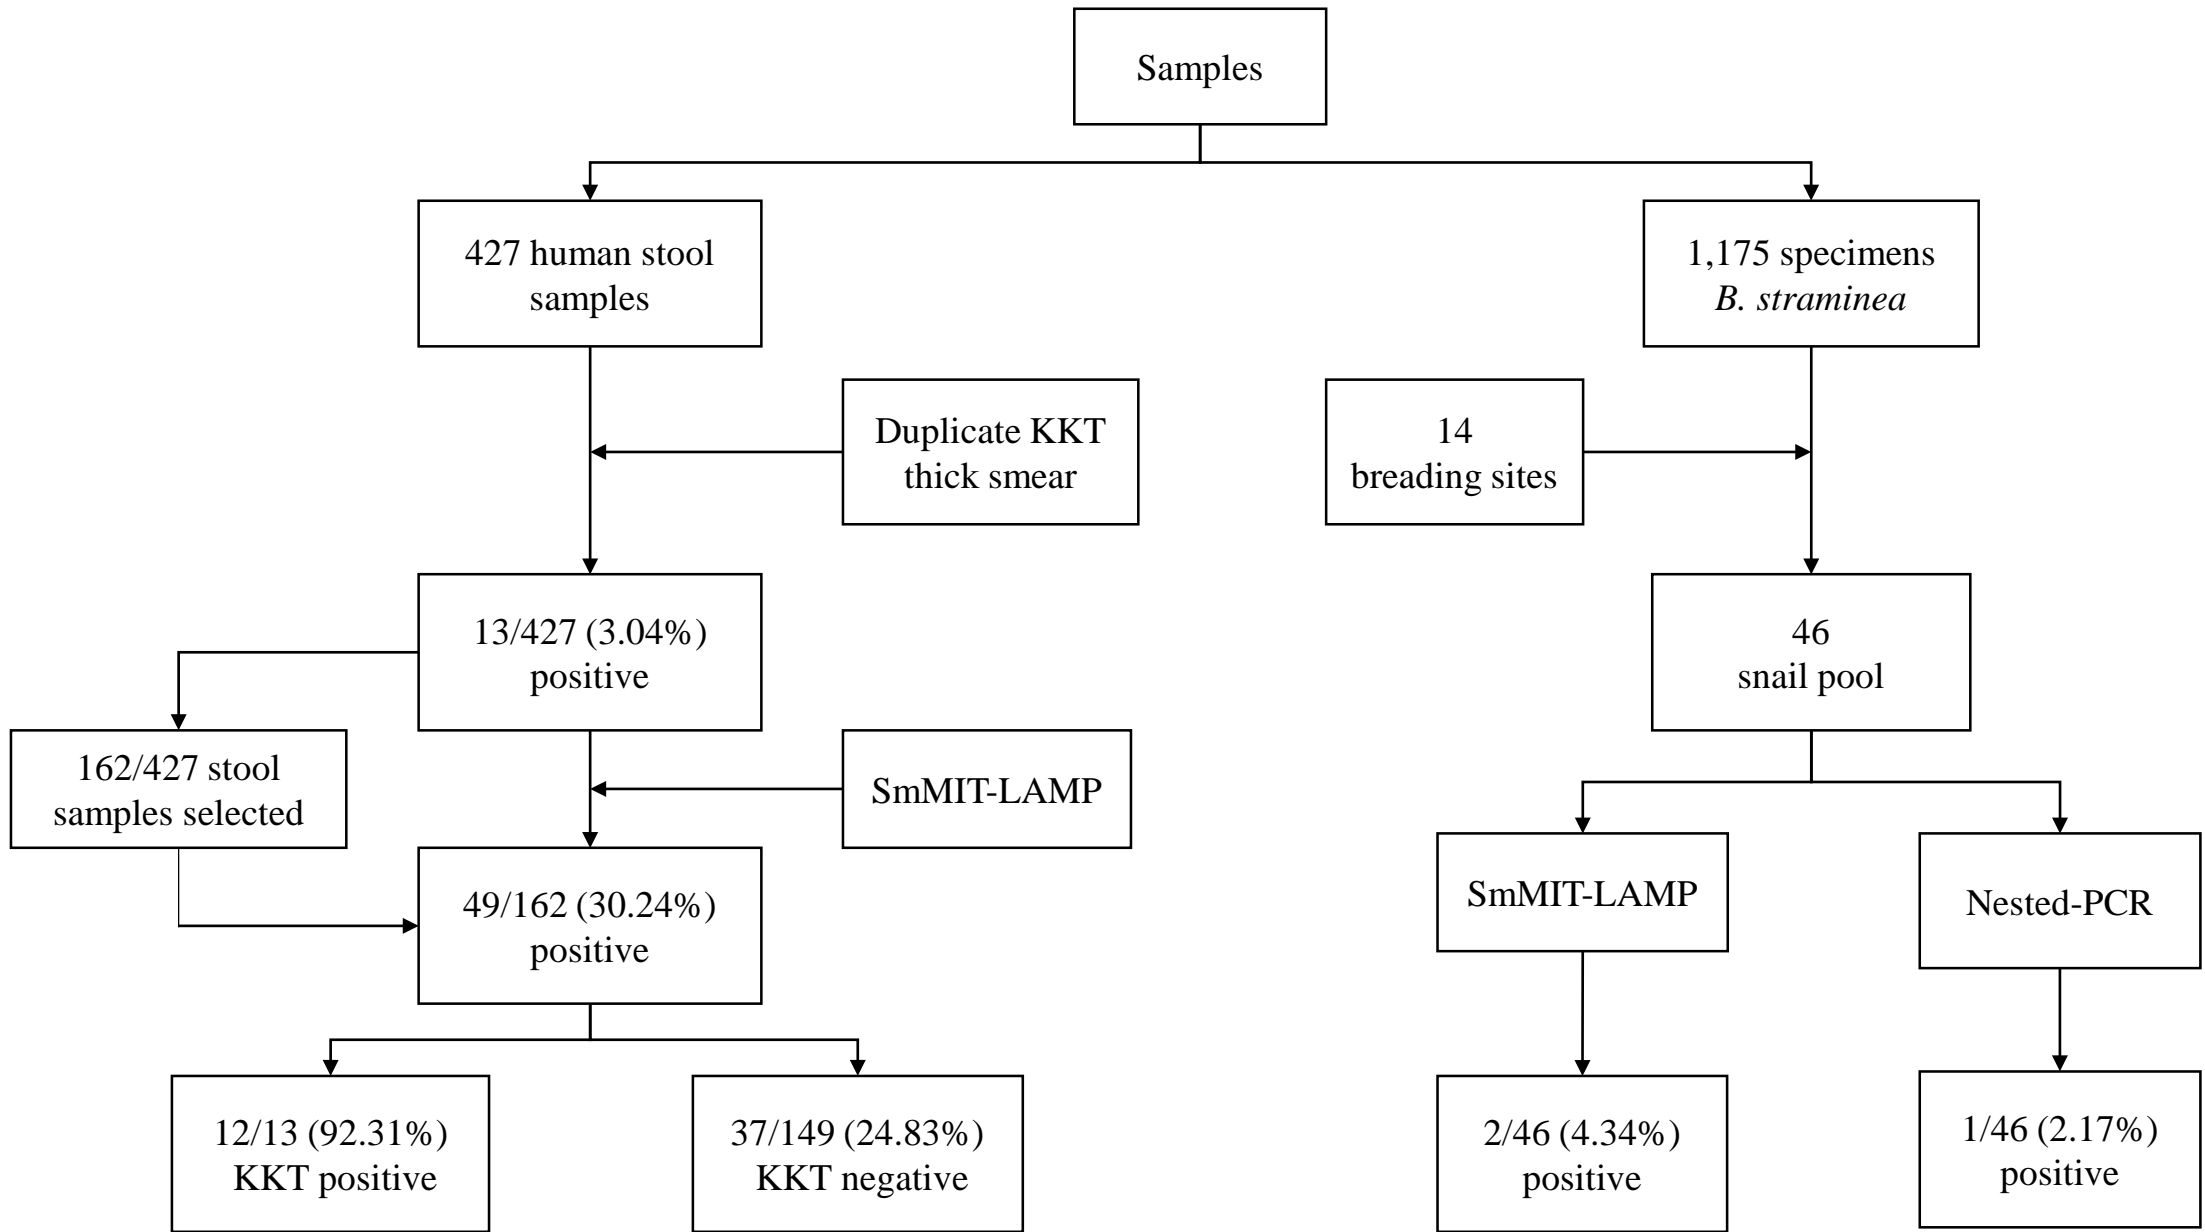

Supplement: pntd.0006314.s002.pdf [file pntd.0006314.s002.pdf]
